# Supplementary material for: Stable integration of an optimized inducible promoter system enables spatiotemporal control of gene expression throughout avian development
Source: PubMed Central journal article supplement (PMC7561481; doi:10.1242/bio.055343), 2020-10-06
Supplement: biolopen-9-055343-s1.pdf [file biolopen-9-055343-s1.pdf]

Table S1

| qPCR primers           |                            |
|------------------------|----------------------------|
| CXCL14 F3 Chick        | 5'-GCAGAAGGAGTAAAGTGCAA-3' |
| CXCL14 R3 Chick        | 5'-GTACCACTTGAGCAGCCTCA-3' |
| Runx2 F1 CQ DC         | 5'-CCGTCCTACTTGAGCCAGAT-3' |
| Runx2 R1 CQ DC         | 5'-ACGTCGGTGATGGCTGGAAG-3' |
| MMP13_F1_universal_SS  | 5'-CCTGATGATGATGTGCAAG-3'  |
| MMP13_R1_universal_SS  | 5'-CCTGTCCTTGAAGACCAG-3'   |
| Gas1_F1_Chick_Quail_ZV | 5'-CCGCTACATGGCCTACTG-3'   |
| Gas1_R2_Chick_ZV       | 5'-CTTGACCGACTCGCAGAT-3'   |

| Cloning primers      |                                                        |
|----------------------|--------------------------------------------------------|
| GAS1 FL F1 CQ DC     | 5'-TGGATTGATGCGAGGAGACC-3'                             |
| GAS1 FL R1 CQ DC     | 5'-CACACGGGGACAGACACAC-3'                              |
| pTet GAS1 F1 CQ DC   | 5'-ACCCTCGTAAAGCCGCCACCATGCCGGCCCGCCG-3'               |
| pTet GAS1 R1 CQ DC   | 5'-GCCGCTTCACTTGTACTGCACTAGAGCGGCGGTAGCAGC-3'          |
| CXCL14 5UTR C F1 DC  | 5'-GAACACAAGACAGAACC-3'                                |
| CXCL14 3UTR U R1 DC  | 5'-GGTGTGAAATCTGAAGTGCA-3'                             |
| pTet Cxcl14 F1 U DC  | 5'-ACCCTCGTAAAGCCGCCACCATGAAGCTCCTGACAGC-3'            |
| pTet Cxcl14 R1 CQ DC | 5'-GCCGCTTCACTTGTACTGCACGCCCTCTTCTTCAT-3'              |
| Mmp13 C F1 FL DC     | 5'-ATGCAACCCAGACTTTCAGC-3'                             |
| Mmp13 C R1 FL DC     | 5'-GGTAGTCAGTGCTTGTTCGC-3'                             |
| pTet MMP13 F1 C DC   | 5'-ACCCTCGTAAAGCCGCCACCATGCAACCCAGACTTTCAGC-3'         |
| pTet MMP13 R1 CQ DC  | 5'-GCCGCTTCACTTGTACTGCATCAGCACCAAATAAGGAGT-3'          |
| Runx2 C F2 FL DC     | 5'-ATGGCATCAAACAGCCTCTT-3'                             |
| Runx2 U R1 FL DC     | 5'-TCAGTACGGCCTCCAAACG-3'                              |
| pTET Runx2 F1 CQ DC  | 5'-ACCCTCGTAAAGCCGCCACCATGGCATCAAACAGCCTCTT-3'         |
| pTET Runx2 R1 U DC   | 5'-GCCGCTTCACTTGTACTGCATCAGTACGGCCTCCAAACG-3'          |
| pTet H2B F1 DC       | 5'-GGCCTTTCGGCCGCCACCATGCCAGAGCCAGCGAAG-3'             |
| pTet H2B R1 DC       | 5'-CCTCCTCGCCCTTGCTCACCATGGTGGCGACCGGTGGAAC-3'         |
| pNanoPB mPGK R2 DC   | 5'-GGTGGCGGCCGAAAGGCCCGGAGATGAGG-3'                    |
| pPID2 Tet Bi F1 DC   | 5'-GGAGCGACAGTGGTAGACAGCCCCATAGAGCCC-3'                |
| Fluor Tet Bi F1 DC   | 5'-ATGGTGAGCAAGGGCGAGG-3'                              |
| rbGlob Tet Bi R1 DC  | 5'-TTAAGAGTCGTACCTGCAGTACAAGTGAAGCGGCCGGCC-3'          |
| Tet rbGlob F1 DC     | 5'-CTGCAGGTGACGACTCTTAAGGTGGCGGCTTACGAGGGTAGGAAGTGG-3' |
| Ori F1 DC            | 5'-GCCTCACTGATTAAGCATTGGTACCCGTAGAAAAGATCAAAGGATC-3'   |
| Ori R1 DC            | 5'-ACATATTTCTCGAGATATCGAATTCGTTTTTCCATAGGCTCCGCC-3'    |
| BlaR F1 DC           | 5'-GGAAAAACGAATTCGATATCTCGAGAAATATGTATCCGCTCATGAGAC-3' |
| BlaR R1 DC           | 5'-GATCCTTTGATCTTTTCTACGGGTACCAATGCTTAATCAGTGAGGC-3'   |
| pNano PB 5'LTR R DC  | 5'-GGCTGTCCCTGATATCTATAACA-3'                          |

|                      |                                                         |
|----------------------|---------------------------------------------------------|
| pNanoPB mPGK F1 DC   | 5'-TATAGATATCAGGGACAGCCGGGTAGGGGAGGCGCTTT-3'            |
| pNanoPB mPGK R2 DC   | 5'-GGTGGCGGCCGAAAGGCCCGGAGATGAGG-3'                     |
| pNano rbGlob R1 DC   | 5'-TCATGAGCGGATACATATTTGAGAAGAGGGACAGCTATGA-3'          |
| pNano PB 3'LTR F2 DC | 5'-GGCTGTCCCTCATAAAAGTTTTGTTACTTTATAGA-3'               |
| pNanoPB rbGlob R1 DC | 5'-AACTTTTATGAGGGACAGCCGAGAAGAGGGACAGCTATGA-3'          |
| pNano PB 3'LTR R2 DC | 5'-GAGCGGATACATATTTCTCGTTAACCCCTAGAAAGATAATC-3'         |
| Fluor F1 DC          | 5'-ATGGTGAGCAAGGGCGAGG-3'                               |
| pNano PB 3'LTR R2 DC | 5'-GAGCGGATACATATTTCTCGTTAACCCCTAGAAAGATAATC-3'         |
| pNano HyPBase F2 DC  | 5'-CCTCATCTCCGGGCCTTTTCGAATTCGCCGCCACCATGGG-3'          |
| pNano HyPBase R2 DC  | 5'-CCGGCCGCTTCACTTGTATCAGAAACAGCTCTGGCACA-3'            |
| pNano mPGK F1 DC     | 5'-GGCGGAGCCTATGGA AAAACGGGTAGGGGAGGCGCTTT-3'           |
| pPID PGK F1 DC       | 5'-GGAGGGAGCGACAGTGGTGGGTAGGGGAGGCGCTT-3'               |
| pNanoPB rbGlob F1 DC | 5'-TACAAGTGAAGCGGCCGG-3'                                |
| pE Kozak F1 DC       | 5'-GCCTTTTCGATTGCCGCCACC-3'                             |
| pNanoPB IRES F1      | 5'-CCTCATCTCCGGGCCTTTTCGAATTCGTGGACTCTCGAGG-3'          |
| Tet mNG R1 DC        | 5'-GCAACTAGAAGGCACAGTCGTTACCCGGGGAGCATGTCAA-3'          |
| Tet mNG F1 DC        | 5'-TGGAGGAGAACCCCGGCCCATGTCTAGACTGGACAAGAGC-3'          |
| mNG P2A R1 DC        | 5'-GGGGCCGGGGTTCTCCTCCA-3'                              |
| Tet Bi mNG F1 DC     | 5'-CCTCATCTCCGGGCCTTTTCGGCCGCCACCATGGTGAGCAAGGGCGA-3'   |
| Tet Bi FL F1 DC      | 5'-GAAAAGCGCCTCCCTACCCGAGAAGAGGGACAGCTATGA-3'           |
| PGK FL F1 DC         | 5'-GGGTAGGGGAGGCGCTTTTC-3'                              |
| rbGlob Tet Bi R1 DC  | 5'-TTAAGAGTCGTACCTGCAGTACAAGTGAAGCGGCCGGCC-3'           |
| Tet rbGlob F1 DC     | 5'-CTGCAGGTGACGACTCTTAAGGTGGCGGCTTTACGAGGGTAGGAAGTGG-3' |
| Tet Fluor R2 DC      | 5'-TCCTCGCCCTTGCTCACCATGGTGGCGGCGGTGAATTCTCCAGGCGATC-3' |
| BGH Tet Bi F1 DC     | 5'-CGACTGTGCCTTCTAGTTGC-3'                              |
| Fluor Tet Bi R1 DC   | 5'-GCAACTAGAAGGCACAGTCGTCATTGTACAGCTCGTCCA-3'           |
| pPID2 Tet Bi R1 DC   | 5'-GAGAGCACGAGTCATCTAGAGGACAGCCATAGAGCCCA-3'            |

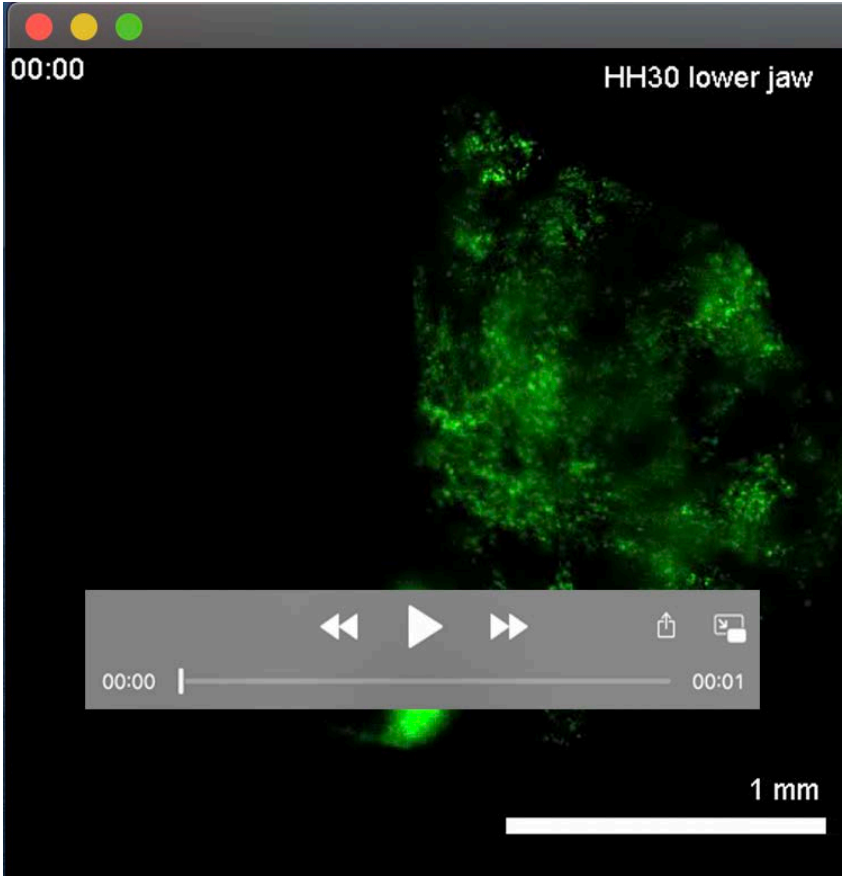

Movie 1
